# Supplementary material
Source: PubMed Central journal article supplement (PMC2507874)

Supplementary Information for

Kinetic and Chemical Mechanism of  $\alpha$ -Isopropylmalate Synthase from  
*Mycobacterium tuberculosis*

Luiz Pedro S. de Carvalho and John S. Blanchard\*

**Figure S1. Initial Velocity Patterns of *Mt*IPMS-catalyzed reaction.**  $\alpha$ -KIV was varied (77  $\mu$ M, 100  $\mu$ M, 143  $\mu$ M, 250  $\mu$ M, and 1000  $\mu$ M) at four fixed AcCoA concentrations (91  $\mu$ M, 125  $\mu$ M, 200  $\mu$ M, and 500  $\mu$ M).

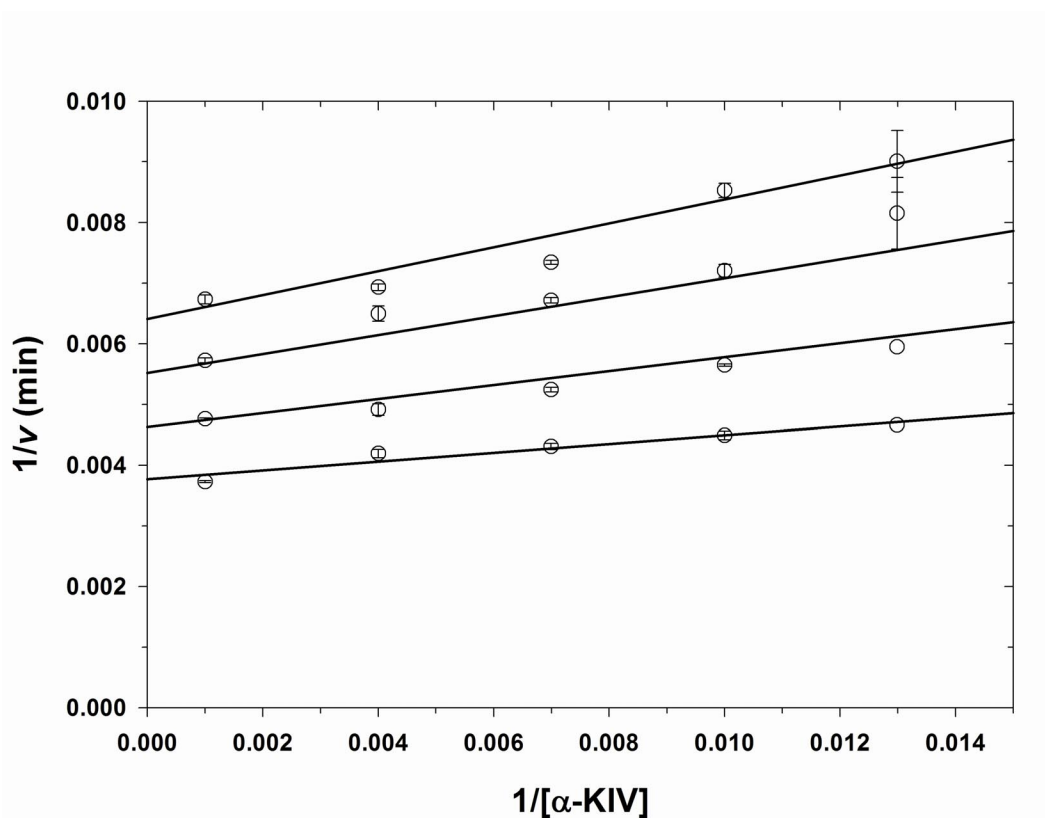

**Figure S2. Saturation curve for AcCoA in the presence of fixed saturating concentration of pyruvate.** Open circles represent the data and the solid line the fit of the data to eq. 2 (for linear substrate inhibition). The inset shows the replot of the data in double reciprocal form. Visual analysis indicates a clear upward curvature at lower concentrations of AcCoA.

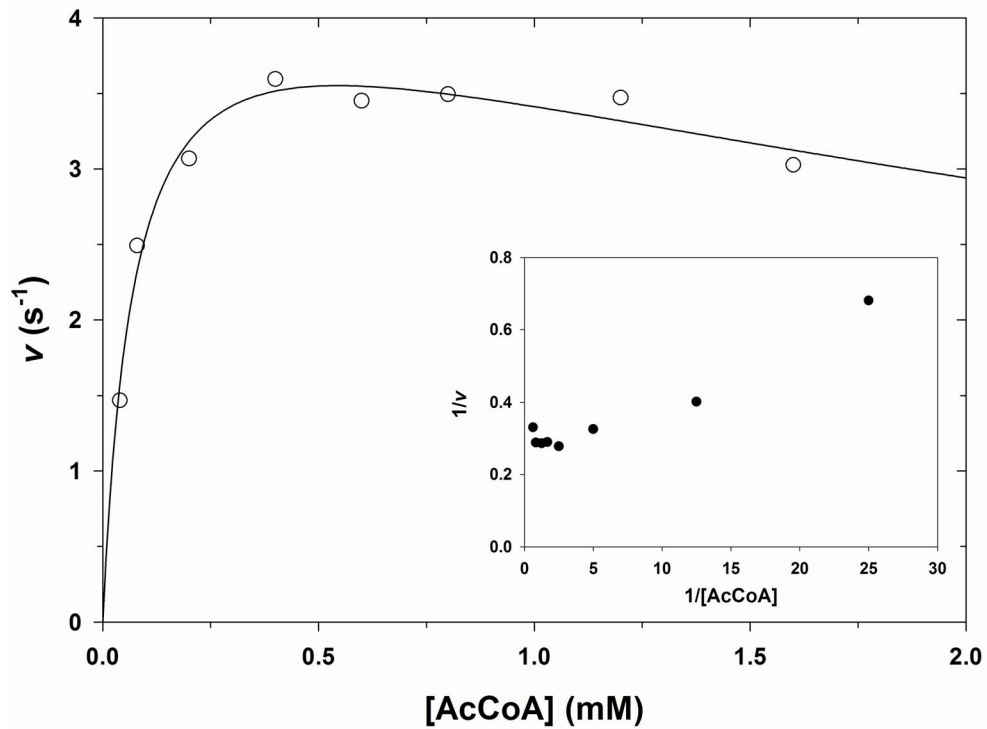

**Figure S3. Saturation curve for  $\alpha$ -ketovalerate in the presence of fixed saturating concentration of AcCoA.** Open circles represent the data and the solid line the fit of the data to eq. 2 (for linear substrate inhibition). The inset shows the replot of the data in double reciprocal form. Visual analysis indicates a clear downward curvature at lower concentrations of  $\alpha$ -ketovalerate.

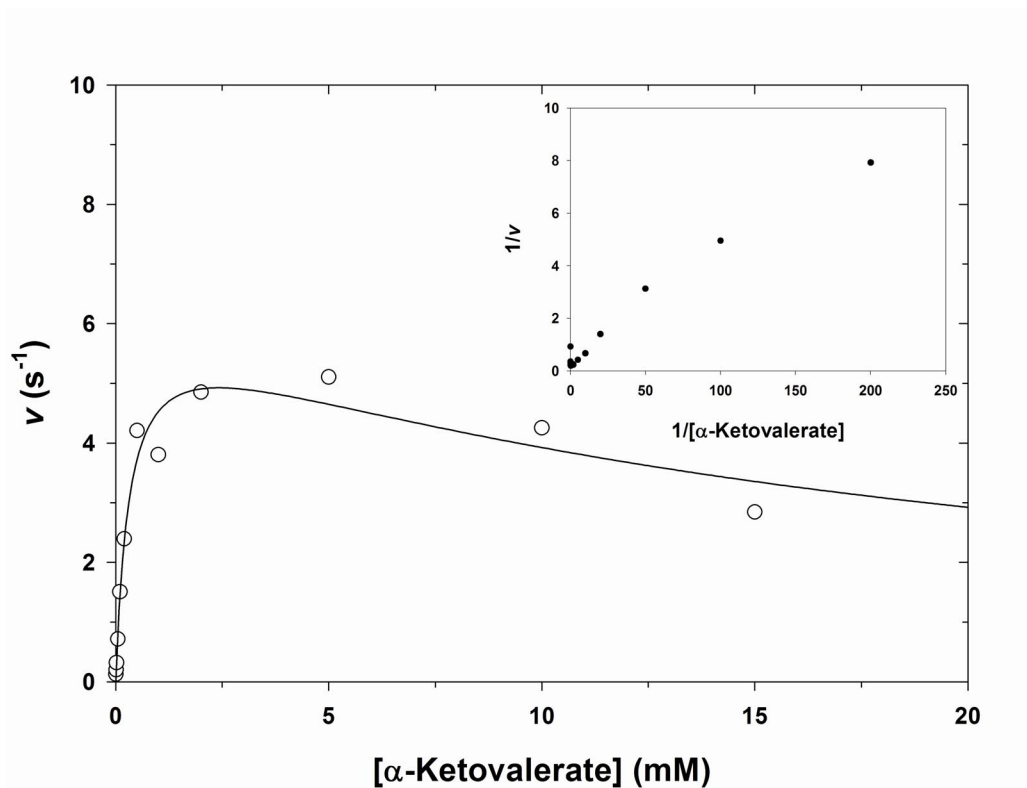

Supplement: NIHMS61201-supplement-si20060516_060.pdf [file NIHMS61201-supplement-si20060516_060.pdf]
